# Supplementary material for: Prognostic Markers in Acute Babesia canis Infections
Source: PubMed Central journal article supplement — J Vet Intern Med. 2016 Jan 4;30(1):174–82. doi: 10.1111/jvim.13822 (PMC4913656; doi:10.1111/jvim.13822), 2016-01-04
Supplement: JVIM-30-174-s001.pdf [file JVIM-30-174-s001.pdf]

**Supplemental file 1.** Characteristics of the individual dogs (animal description, travel history, and clinical signs). 0: absent; 1: present.

| #  | Description |                                |                                |                    |                     | Clinical signs                                              |                      |                             |             |         |        |                             |          |          |                          |           |
|----|-------------|--------------------------------|--------------------------------|--------------------|---------------------|-------------------------------------------------------------|----------------------|-----------------------------|-------------|---------|--------|-----------------------------|----------|----------|--------------------------|-----------|
|    | Outcome     | Breed                          | Age<br>(Y= Year;<br>Mo=months) | Sex                | Body weight<br>[kg] | Assumed location<br>of infection based<br>on travel history | Apathy /<br>Lethargy | Pale<br>mucous<br>membranes | Pigmenturia | Icterus | Fieber | Body<br>temeprature<br>[°C] | Anorexia | Vomiting | Water<br>hammer<br>pulse | Epistaxis |
| 1  | Died        | Flat-Coated<br>Retriever       | 2 Y                            | female<br>intact   | 29                  | Russia                                                      | 1                    | 1                           | 0           | 0       | 1      | 40.1                        | 0        | 0        | 1                        | 0         |
| 2  | Died        | Pekingese                      | 2 Y 7 Mo                       | male               | 7                   | Croatia                                                     | 1                    | 1                           | 1           | 1       | 0      | 37.9                        | 0        | 0        | 1                        | 0         |
| 3  | Died        | German Shepherd                | 6Y 11 Mo                       | female<br>neutered | 38.5                | Hungary                                                     | 1                    | 1                           | 1           | 1       | 0      | 37.8                        | 1        | 1        | 0                        | 0         |
| 4  | Died        | Mix                            | 5Y 5 Mo                        | male intact        | 15.9                | France                                                      | 1                    | 1                           | 1           | 0       | 0      | 38.6                        | 0        | 0        | 0                        | 0         |
| 5  | Died        | Beagle                         | 5Y 5 Mo                        | male<br>gelded     | 15.8                | no travel history<br>(Switzerland)                          | 1                    | 1                           | 1           | 0       | 1      | 39.1                        | 0        | 0        | 0                        | 0         |
| 6  | Died        | German Pinscher                | 4 Y 9 Mo                       | female             | 13.9                | France                                                      | 1                    | 1                           | 1           | 1       | 0      | 38                          | 0        | 1        | 0                        | 0         |
| 7  | Died        | Mix                            | 4 Y 8 Mo                       | male intact        | 9.5                 | France                                                      | 1                    | 1                           | 1           | 0       | 0      | 38.6                        | 0        | 0        | 0                        | 1         |
| 8  | Died        | English Cocker<br>Spaniel      | 2 Y 3 Mo                       | male intact        | 13.2                | no travel history<br>(Switzerland)                          | 1                    | 1                           | 0           | 0       | 0      | 37.9                        | 1        | 0        | 1                        | 0         |
| 9  | Survival    | Bergamasco                     | 4 Y 7 Mo                       | male intact        | 24                  | Serbia                                                      | 1                    | 1                           | 1           | 1       | 0      | 38.5                        | 1        | 0        | 0                        | 1         |
| 10 | Survival    | Airedale Terrier               | 9 Y                            | female<br>neutered | 20.7                | no travel history<br>(Switzerland)                          | 1                    | 1                           | 0           | 0       | 1      | 40.5                        | 0        | 0        | 0                        | 0         |
| 11 | Survival    | Beagle                         | 2 Y 7 Mo                       | male intact        | 13.3                | France                                                      | 1                    | 1                           | 1           | 1       | 0      | 38.5                        | 1        | 1        | 0                        | 0         |
| 12 | Survival    | West Highland<br>White Terrier | 10 Y 9 Mo                      | male<br>gelded     | 11                  | Hungary                                                     | 1                    | 1                           | 0           | 1       | 0      | 38                          | 0        | 1        | 0                        | 0         |
| 13 | Survival    | Greater Swiss<br>Mountain Dog  | 5 Y 2 Mo                       | male<br>gelded     | 62.1                | no travel history<br>(Switzerland)                          | 1                    | 1                           | 1           | 0       | 1      | 39.7                        | 0        | 0        | 0                        | 0         |
| 14 | Survival    | Yugoslavian<br>Tricolour Hound | 7 Mo                           | female<br>intact   | 14.3                | no travel history<br>(Switzerland)                          | 1                    | 1                           | 0           | 0       | 0      | 38.5                        | 0        | 0        | 1                        | 0         |
| 15 | Survival    | Bernese Mountain<br>Dog        | 5 Y                            | male intact        | 42                  | no travel history<br>(Switzerland)                          | 1                    | 1                           | 1           | 0       | 1      | 39.5                        | 0        | 0        | 0                        | 1         |
